# Supplementary material for: Importance of the Webb, Pearman, and Leuning (WPL) correction for the measurement of small CO 2 fluxes
Source: Copernicus journal article supplement (doi:10.5194/amt-14-7291-2021), 2021-11-19
Supplement: Supplementary file 1 [file amt-14-7291-2021-supplement.pdf]

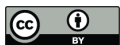

*Supplement of*

## **Importance of the Webb, Pearman, and Leuning (WPL) correction for the measurement of small CO<sub>2</sub> fluxes**

**Katharina Jentsch et al.**

*Correspondence to:* Thomas Foken ([thomas.foken@uni-bayreuth.de](mailto:thomas.foken@uni-bayreuth.de))

The copyright of individual parts of the supplement might differ from the article licence.

### Temperature dependence of quantities in Eq. (1)

The WPL correction is given by

$$F_c = \overline{w'\rho_c'} + \mu \frac{\overline{\rho_c}}{\overline{\rho_a}} \overline{w'\rho_w'} + (1 + \mu \sigma) \overline{\rho_c} \frac{\overline{w'T'}}{\overline{T}}, \quad (\text{S1})$$

Most quantities in Eq. (S1) are temperature dependent. The relevant temperature-dependent quantities of the second term of Eq. (1) are  $\overline{\rho_c}/\overline{\rho_a}$  and in the third term  $(1 + \mu \sigma)\overline{\rho_c}/\overline{T}$  (essentially  $\sigma$  and  $\overline{T}$ ). The numerical values are taken from a book chapter (Foken et al., 2021) with extensive tables based on the current ITS-90 (Preston-Thomas, 1990) and TEOS-10 (Feistel et al., 2010; Wright et al., 2010) standards. The book should have been published long ago but is now scheduled for December 2021.

Especially the third term is of interest since it has the more significant influence on the WPL correction according to the present study. The results for a constant assumed value of  $\rho_c = 0.00078 \text{ kg m}^{-3}$  are given in Fig. S1. Note: The density of  $\text{CO}_2$  is about a factor of 1.55 greater than that of dry air, and the factor is almost independent of temperature.

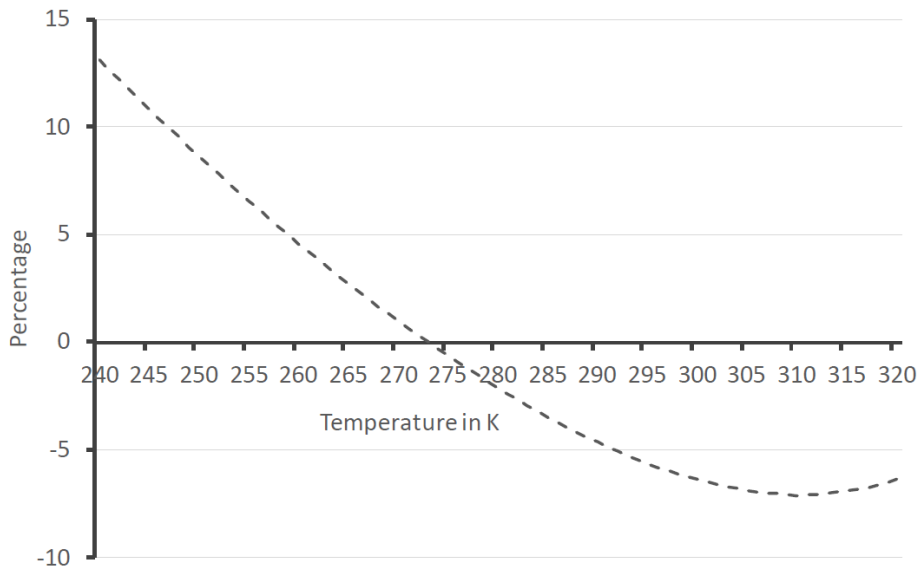

**Figure S1: Percentage of the temperature dependent parts of the third term in relation to the value at 273 K (constant density of carbon dioxide) for kinematic sensible heat flux**

If the sensible heat fluxes are used in energetic units (correction with air density and specific heat at constant pressure), there is nearly no temperature dependency (Fig. S2).

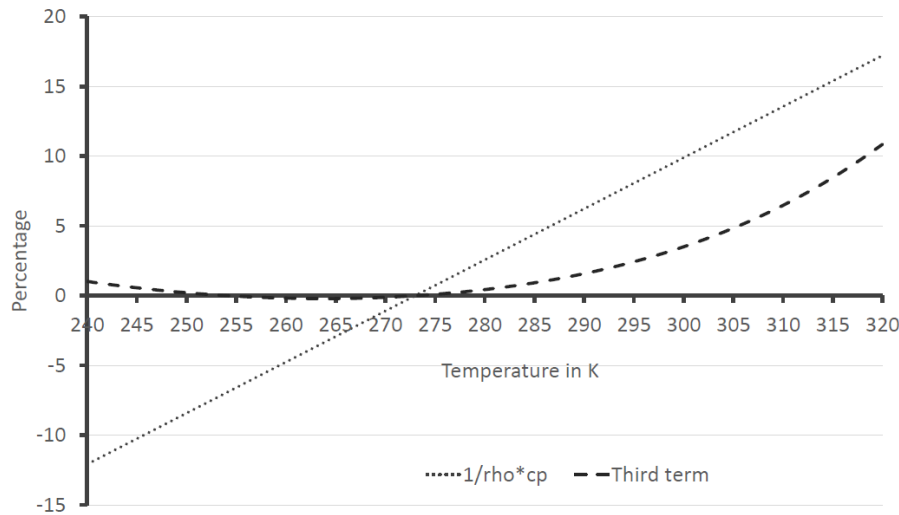

**Figure S2: Percentage of the temperature dependent parts of the third term in relation to the value at 273 K (constant density of carbon dioxide) for energetic sensible heat flux. Additionally, the percentage of the term  $1/(\rho_d c_p)$  in relation to the value at 273 K is shown**

## References

Feistel, R., Wright, D. G., Kretzschmar, H. J., Hagen, E., Herrmann, S., and Span, R.: Thermodynamic properties of sea air, *Ocean Sci.*, 6, 91-141, doi: 10.5194/os-6-91-2010, 2010.

Foken, T., Hellmuth, O., Huwe, B., and Sonntag, D.: Physical quantities, in: *Springer Handbook of Atmospheric Measurements*, edited by: Foken, T., Springer Nature, Switzerland, 107-151, doi: 10.1007/978-3-030-51171-4\_5, 2021.

Preston-Thomas, H.: The international temperature scale of 1990 (ITS-90), *Metrologia*, 27, 3-10, 1990.

Wright, D. G., Feistel, R., Reissmann, J. H., Miyagawa, K., Jackett, D. R., Wagner, W., Overhoff, U., Guder, C., Feistel, A., and Marion, G. M.: Numerical implementation and oceanographic application of the thermodynamic potentials of liquid water, water vapour, ice, seawater and humid air – Part 2: The library routines, *Ocean Sci.*, 6, 695-718, doi: 10.5194/os-6-695-2010, 2010.
